# Supplementary material for: Label-free, disposable fiber-optic biosensors for DNA hybridization detection
Source: Royal Society of Chemistry journal article supplement (doi:10.1039/c3an36791f), 2013-01-01
Supplement: c3an36791f.pdf [file c3an36791f.pdf]

## Label-free, disposable fiber-optic biosensor for DNA hybridization detection

Ming-jie Yin<sup>1\*</sup>, Chuang Wu<sup>1</sup>, Li-yang Shao<sup>1</sup>, Wing Kin Edward Chan<sup>1</sup>, A. Ping Zhang<sup>2</sup>, Chao Lu<sup>3</sup> and Hwa-yaw Tam<sup>1</sup>

<sup>1</sup>Photonics Research Centre, Department of Electrical Engineering, The Hong Kong Polytechnic University, Kowloon, Hong Kong, China

<sup>2</sup> Center for Optical and Electromagnetic Research, State Key Laboratory of Modern Optical Instrumentation, Zhejiang University, Hangzhou 310058, China

<sup>3</sup>Photonics Research Centre, Department of Electronic and Information Engineering, The Hong Kong Polytechnic University, Kowloon, Hong Kong, China

---

\*Corresponding author: M.J. Yin: Tel: +852-27664678; E-mail: [yinmingjie0316@qq.com](mailto:yinmingjie0316@qq.com)

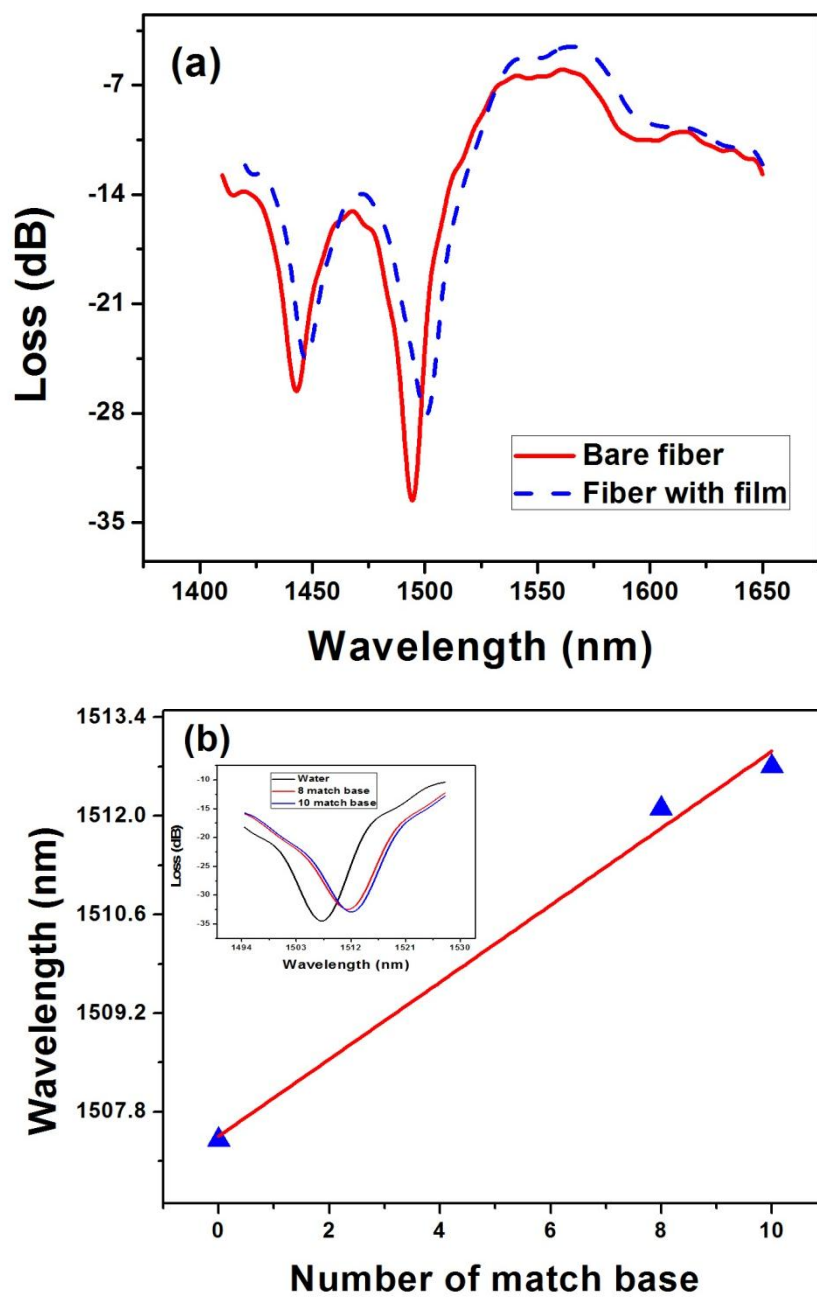

**Fig. S1** (a) Spectrum change of TCFMI before (solid line) and after (dashed line) the deposition of  $(\text{PEI}/\text{PAA})_4(\text{PEI}/\text{DNA})_1$  multilayer film. (b) Wavelength shift of TCFMI-based DNA sensor in target DNA solution with match base number 8 and 10.

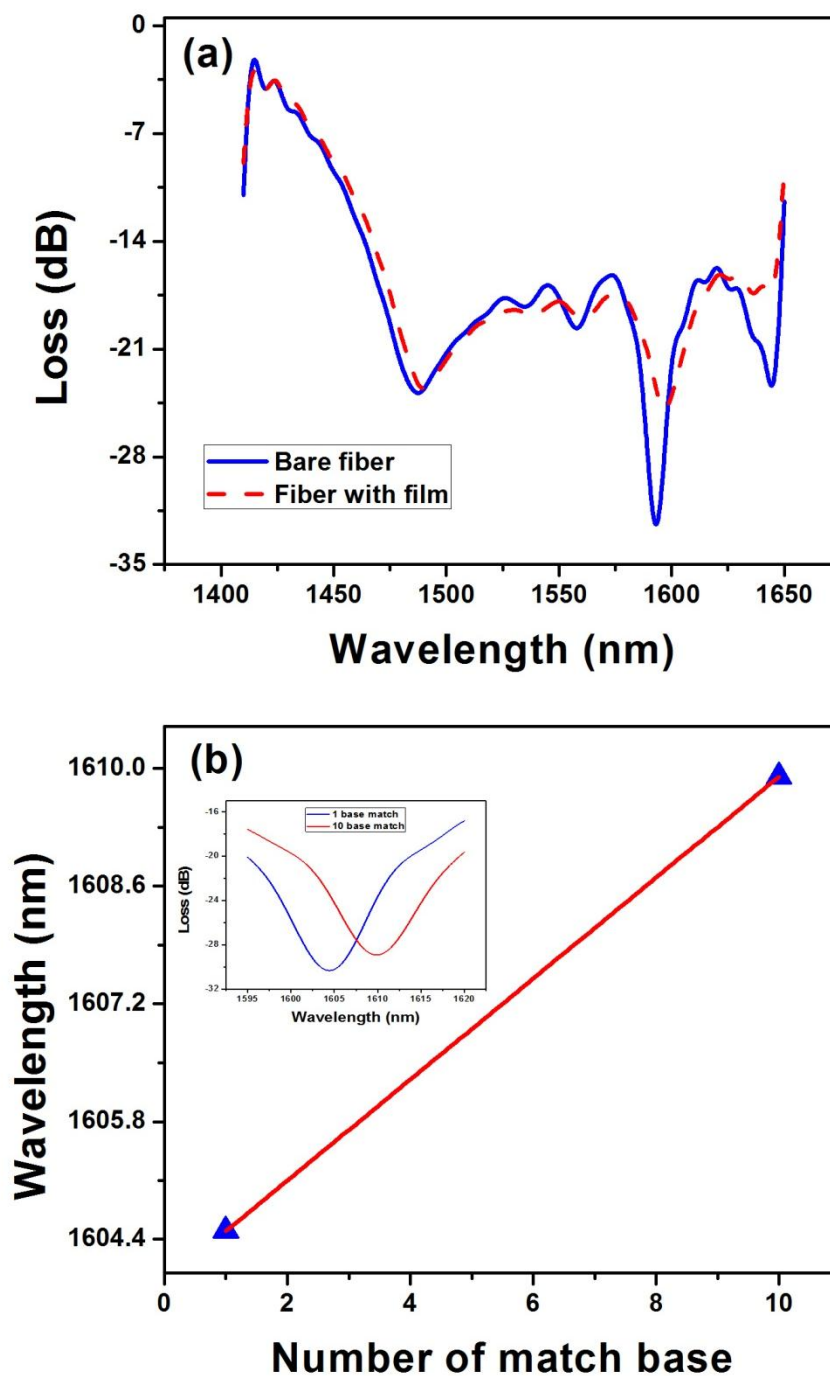

**Fig. S2** (a) Spectrum change of TCFMI before (solid line) and after (dashed line) the deposition of  $(\text{PEI}/\text{PAA})_4(\text{PEI}/\text{DNA})_1$  multilayer film. (b) Wavelength shift of TCFMI-based DNA sensor in target DNA solution with match base number 10.
